# Supplementary material for: S100A Family Proteins and Mesothelin in Tear Proteome Are Associated With Retinal Vein Occlusion
Source: Research Square preprint supplement (doi:10.21203/rs.3.rs-989916/v1), 2021-10-21
Supplement: Supplementary file 1 [file 74ed4cd9417cbe0f43a3be40.xlsx]

## Sheet: Proteins Quantitation
Uniprot Accession number	Entry name	Gene names (primary )	Protein names	p-value	log(10) p-value	Frequency in CRVO group	Frequency in Control group	Concentration median (CRVO group)	Concentration median (control group)	IQR(q1-q3) in CRVO group	IQR (q1-q3) in Control group	Fold Change (relative to Control group), linear sacle	log2FC (relative to Control group (logarithmic scale)
P61769	B2MG_HUMAN	B2M	Beta-2-microglobulin	1.49006e-10	9.8268	0.875	0.9	2.31865	12.9389	2.15605	10.1874	0.1792	-2.48036
P60709	ACTB_HUMAN	ACTB	Actin, cytoplasmic 1	0.00467361	2.33035	1	1	5.6805	14.0306	10.4482	8.49928	0.404865	-1.30449
Q96DA0	ZG16B_HUMAN	ZG16B	Zymogen granule protein 16 homolog B	0.00386258	2.41312	0.729167	0.733333	1.2913	2.6104	1.22295	3.20215	0.494675	-1.01545
P01859	IGHG2_HUMAN	IGHG2	Immunoglobulin heavy constant gamma 2	0.000762182	3.11794	0.979167	1	6.9221	13.9474	12.1895	12.1	0.496302	-1.01071
P01860	IGHG3_HUMAN	IGHG3	Immunoglobulin heavy constant gamma 3	0.0220115	1.65735	0.979167	0.966667	0.5599	0.9396	1.0237	1.5647	0.595892	-0.746878
P02790	HEMO_HUMAN	HPX	Hemopexin	0.0122805	1.91078	0.916667	0.966667	2.05	3.2131	2.20348	4.7813	0.638013	-0.648342
A0A0A0MRZ7	KVD26_HUMAN	IGKV2D-26	Immunoglobulin kappa variable 2D-26	0.0213877	1.66984	0.666667	0.733333	1.57565	2.3177	1.0697	1.85672	0.679833	-0.556747
P0DOY3	IGLC3_HUMAN	IGLC3	Immunoglobulin lambda constant 3	0.0111807	1.95153	1	1	27.1838	34.928	18.808	20.8437	0.778282	-0.361635
P01591	IGJ_HUMAN	JCHAIN	Immunoglobulin J chain	0.0399505	1.39848	1	1	10.9667	11.6172	9.35123	16.8045	0.944005	-0.0831329
P10909	CLUS_HUMAN	CLU	Clusterin	0.0482675	1.31635	1	0.966667	5.3722	4.8634	5.6086	4.694	1.10462	0.143548
P22079	PERL_HUMAN	LPO	Lactoperoxidase	0.0161228	1.79256	0.75	0.666667	0.74925	0.52545	0.60175	0.3277	1.42592	0.511894
P04792	HSPB1_HUMAN	HSPB1	Heat shock protein beta-1	0.00948051	2.02317	0.958333	0.966667	2.055	1.3806	3.99757	1.2531	1.48848	0.573843
Q16378	PROL4_HUMAN	PRR4	Proline-rich protein 4	0.0121634	1.91494	0.729167	0.733333	45.0228	30.0112	53.6886	25.7757	1.5002	0.585157
P19652	A1AG2_HUMAN	ORM2	Alpha-1-acid glycoprotein 2	0.0397423	1.40075	0.958333	0.933333	1.6515	1.07725	1.8748	1.3595	1.53307	0.616424
P02647	APOA1_HUMAN	APOA1	Apolipoprotein A-I	0.0393462	1.4051	1	0.966667	6.3937	4.1056	12.5352	6.9204	1.55731	0.639058
P02787	TRFE_HUMAN	TF	Serotransferrin	0.0255534	1.59255	1	1	13.7433	8.7346	16.5559	9.90597	1.57343	0.653915
P01023	A2MG_HUMAN	A2M	Alpha-2-macroglobulin	0.0132287	1.87848	0.645833	0.833333	1.5786	0.992	1.11355	0.9271	1.59133	0.670234
P0C0L4	CO4A_HUMAN	C4A	Complement C4-A	0.00192707	2.7151	0.583333	0.7	0.86225	0.528	0.580975	0.5511	1.63305	0.707568
P25311	ZA2G_HUMAN	AZGP1	Zinc-alpha-2-glycoprotein	2.01679e-07	6.69534	1	1	49.0935	29.8834	14.4565	19.6283	1.64284	0.71619
P01036	CYTS_HUMAN	CST4	Cystatin-S	0.00160891	2.79347	1	0.966667	22.601	13.6384	9.75313	11.914	1.65716	0.728712
Q9UGM3	DMBT1_HUMAN	DMBT1	Deleted in malignant brain tumors 1 protein	0.00181999	2.73993	0.833333	0.966667	12.5724	7.4431	10.372	7.514	1.68914	0.75629
P02763	A1AG1_HUMAN	ORM1	Alpha-1-acid glycoprotein 1	0.0319269	1.49584	0.958333	0.966667	6.37895	3.3974	9.00085	5.1103	1.8776	0.908888
P01034	CYTC_HUMAN	CST3	Cystatin-C	0.00846443	2.0724	0.895833	0.6	1.5366	0.81385	0.90865	1.10122	1.88806	0.916907
Q13421	MSLN_HUMAN	MSLN	Mesothelin	0.000143885	3.84198	0.8125	0.833333	1.0756	0.5447	0.745	0.4602	1.97466	0.981608
Q99935	PROL1_HUMAN	OPRPN	Opiorphin prepropeptide	0.000591642	3.22794	1	0.966667	48.4299	23.9535	38.0373	29.7605	2.02183	1.01566
P06703	S10A6_HUMAN	S100A6	Protein S100-A6	6.00289e-05	4.22164	1	0.9	8.616	3.7012	18.8425	2.4306	2.32789	1.21903
P80303	NUCB2_HUMAN	NUCB2	Nucleobindin-2	2.14794e-06	5.66798	0.625	0.6	0.913	0.37325	0.7756	0.22285	2.44608	1.29047
P02766	TTHY_HUMAN	TTR	Transthyretin	8.86583e-06	5.05228	0.875	0.533333	0.78125	0.27435	0.777025	0.207175	2.84764	1.50977
P06702	S10A9_HUMAN	S100A9	Protein S100-A9	9.50476e-14	13.0221	1	0.9	8.7097	2.0558	17.678	1.19285	4.23665	2.08292
P05109	S10A8_HUMAN	S100A8	Protein S100-A8	1.74973e-12	11.757	0.979167	0.833333	3.3532	0.6829	7.8764	0.6167	4.91024	2.29579
A0A075B6K5	LV39_HUMAN	IGLV3-9	Immunoglobulin lambda variable 3-9	0.290887	0.536276	0.583333	0.666667	0.84475	1.11815	0.73345	0.631225	0.755489	-0.404517
A0A075B6P5	KV228_HUMAN	IGKV2-28	Immunoglobulin kappa variable 2-28	0.783901	0.105739	0.666667	0.733333	0	0	0	0
A0A075B6S2	KVD29_HUMAN	IGKV2D-29	Immunoglobulin kappa variable 2D-29	0.428671	0.367876	0.666667	0.733333	0	0	0	0
A0A075B6S6	KVD30_HUMAN	IGKV2D-30	Immunoglobulin kappa variable 2D-30			0.666667	0.766667	0	0	0	0
A0A087WW87	KV240_HUMAN	IGKV2-40	Immunoglobulin kappa variable 2-40	0.254762	0.593865	0.6875	0.733333	0	0	0	0
A0A0C4DH25	KVD20_HUMAN	IGKV3D-20	Immunoglobulin kappa variable 3D-20	0.323435	0.490214	0.916667	0.966667	0	0	0	0
A0M8Q6	IGLC7_HUMAN	IGLC7	Immunoglobulin lambda constant 7			1	0.966667	0	0	0	0
A2NJV5	KV229_HUMAN	IGKV2-29	Immunoglobulin kappa variable 2-29			0.666667	0.733333	0	0	0	0
A5A3E0	POTEF_HUMAN	POTEF	POTE ankyrin domain family member F	0.71701	0.144475	1	0.966667	0	0	0	0
B9A064	IGLL5_HUMAN	IGLL5	Immunoglobulin lambda-like polypeptide 5	0.0143327	1.84367	1	1	0	0	0	45.6011
O75556	SG2A1_HUMAN	SCGB2A1	Mammaglobin-B	0.154522	0.811009	1	0.933333	54.9384	44.7999	35.7965	25.3332	1.22631	0.294319
O95968	SG1D1_HUMAN	SCGB1D1	Secretoglobin family 1D member 1	0.665415	0.176908	0.875	0.866667	17.7013	14.623	12.1812	7.68815	1.21051	0.275612
P00338	LDHA_HUMAN	LDHA	L-lactate dehydrogenase A chain	0.231878	0.63474	0.5625	0.866667	0.8199	1.24695	1.1638	1.02907	0.657524	-0.604884
P00352	AL1A1_HUMAN	ALDH1A1	Retinal dehydrogenase 1	0.0954947	1.02002	0.666667	0.966667	1.16015	0.8521	1.63952	1.1068	1.36152	0.445217
P00450	CERU_HUMAN	CP	Ceruloplasmin	0.684226	0.1648	0.854167	0.933333	0.9668	1.4393	0.8748	1.07665	0.671715	-0.574078
P00738	HPT_HUMAN	HP	Haptoglobin	0.243275	0.613902	0.958333	0.9	6.5378	5.7784	4.94268	6.20115	1.13142	0.178135
P00739	HPTR_HUMAN	HPR	Haptoglobin-related protein	0.149323	0.825872	0.875	0.9	0	0	0	0
P00751	CFAB_HUMAN	CFB	Complement factor B	0.993637	0.00277246	0.666667	0.833333	0.5451	0.7332	0.982875	0.8849	0.743453	-0.427686
P01009	A1AT_HUMAN	SERPINA1	Alpha-1-antitrypsin	0.318672	0.496656	1	1	14.4865	12.5961	16.6317	17.8622	1.15008	0.201732
P01011	AACT_HUMAN	SERPINA3	Alpha-1-antichymotrypsin	0.109059	0.96234	0.979167	0.966667	1.4995	1.0925	1.30925	1.1333	1.37254	0.456848
P01024	CO3_HUMAN	C3	Complement C3	0.342862	0.46488	0.895833	0.966667	3.2418	2.7495	4.00745	2.9816	1.17905	0.237626
P01037	CYTN_HUMAN	CST1	Cystatin-SN	0.238986	0.621628	1	0.966667	2.83865	5.8781	7.62282	7.9575	0.48292	-1.05014
P01614	KVD40_HUMAN	IGKV2D-40	Immunoglobulin kappa variable 2D-40			0.6875	0.733333	0	0	0	0
P01615	KVD28_HUMAN	IGKV2D-28	Immunoglobulin kappa variable 2D-28			0.666667	0.733333	0	0	0	0
P01619	KV320_HUMAN	IGKV3-20	Immunoglobulin kappa variable 3-20	0.946072	0.0240757	0.916667	0.966667	1.99255	1.8193	2.00815	1.7592	1.09523	0.131232
P01700	LV147_HUMAN	IGLV1-47	Immunoglobulin lambda variable 1-47	0.425977	0.370614	0.645833	0.7	0.8421	0.9846	0.5174	0.5905	0.855271	-0.225546
P01833	PIGR_HUMAN	PIGR	Polymeric immunoglobulin receptor	0.0537736	1.26943	1	1	14.011	19.8874	12.1693	16.9953	0.704518	-0.505291
P01834	IGKC_HUMAN	IGKC	Immunoglobulin kappa constant	0.90656	0.0426032	1	1	46.2492	45.4962	25.6057	17.084	1.01655	0.0236824
P01857	IGHG1_HUMAN	IGHG1	Immunoglobulin heavy constant gamma 1	0.14107	0.850567	1	0.966667	17.622	25.3371	26.6186	11.3281	0.695502	-0.523874
P01861	IGHG4_HUMAN	IGHG4	Immunoglobulin heavy constant gamma 4	0.253709	0.595664	0.916667	0.966667	0.893	0	1.96975	1.7483	Inf	Inf
P01871	IGHM_HUMAN	IGHM	Immunoglobulin heavy constant mu	0.399711	0.398254	0.854167	0.966667	0.9704	1.4626	1.7752	1.8073	0.663476	-0.591884
P01876	IGHA1_HUMAN	IGHA1	Immunoglobulin heavy constant alpha 1	0.133021	0.876081	1	1	49.8999	56.6661	18.8939	17.398	0.880594	-0.18345
P01877	IGHA2_HUMAN	IGHA2	Immunoglobulin heavy constant alpha 2	0.306804	0.513139	1	1	14.4022	12.487	10.3932	14.6421	1.15338	0.205868
P02652	APOA2_HUMAN	APOA2	Apolipoprotein A-II	0.310549	0.507869	0.833333	0.8	2.34605	1.7306	4.804	3.00353	1.35563	0.438961
P02765	FETUA_HUMAN	AHSG	Alpha-2-HS-glycoprotein	0.256761	0.59047	0.6875	0.8	2.026	1.70295	2.3409	1.36922	1.1897	0.250598
P02768	ALBU_HUMAN	ALB	Albumin			1	1	100	100	0	0	1	0
P02774	VTDB_HUMAN	GC	Vitamin D-binding protein	0.773819	0.11136	0.520833	0.8	0.6009	0.67055	0.9382	0.81805	0.89613	-0.15822
P02788	TRFL_HUMAN	LTF	Lactotransferrin	0.249569	0.60281	1	1	105.442	108.03	66.7827	38.7076	0.976042	-0.0349845
P04083	ANXA1_HUMAN	ANXA1	Annexin A1	0.620398	0.207329	0.9375	0.966667	1.6653	1.6047	1.824	1.8161	1.03776	0.0534785
P04217	A1BG_HUMAN	A1BG	Alpha-1B-glycoprotein	0.816177	0.0882154	0.6875	0.8	0.8647	0.90805	0.6972	0.854775	0.95226	-0.070572
P04406	G3P_HUMAN	GAPDH	Glyceraldehyde-3-phosphate dehydrogenase	0.752313	0.123601	0.875	0.933333	2.50085	3.48685	3.72855	2.49123	0.717223	-0.479506
P06310	KV230_HUMAN	IGKV2-30	Immunoglobulin kappa variable 2-30	0.812858	0.0899854	0.666667	0.766667	0	0	0	0
P06396	GELS_HUMAN	GSN	Gelsolin	0.79174	0.101418	0.9375	0.966667	1.2007	1.7324	1.8474	1.1969	0.693085	-0.528896
P06733	ENOA_HUMAN	ENO1	Alpha-enolase	0.45653	0.340531	0.979167	0.966667	3.3112	4.748	7.0388	5.674	0.697388	-0.519966
P07737	PROF1_HUMAN	PFN1	Profilin-1	0.347215	0.459401	0.6875	0.8	1.0415	0.89665	1.0581	0.403775	1.16155	0.216046
P08727	K1C19_HUMAN	KRT19	Keratin, type I cytoskeletal 19	0.13793	0.86034	0.625	0.866667	0.9297	1.1339	0.93185	2.69417	0.819914	-0.286456
P09211	GSTP1_HUMAN	GSTP1	Glutathione S-transferase P	0.0642764	1.19195	0.895833	0.966667	2.0845	3.8688	3.47295	3.4101	0.538798	-0.892185
P09228	CYTT_HUMAN	CST2	Cystatin-SA	0.0403758	1.39388	1	0.933333	0	0	0	0
P0C0L5	CO4B_HUMAN	C4B; C4B_2	Complement C4-B	0.209466	0.678886	0.583333	0.7	0	0	0	0
P0CF74	IGLC6_HUMAN	IGLC6	Immunoglobulin lambda constant 6			1	0.966667	0	0	0	0
P0CG04	IGLC1_HUMAN	IGLC1	Immunoglobulin lambda constant 1	0.577522	0.238432	1	1	0.10585	0	0.554225	0.84305	Inf	Inf
P0CG38	POTEI_HUMAN	POTEI	POTE ankyrin domain family member I	0.278618	0.55499	0.979167	0.966667	0	0	0	0
P0CG39	POTEJ_HUMAN	POTEJ	POTE ankyrin domain family member J	0.448199	0.348529	0.979167	0.966667	0	0	0	0
P0DMV8	HS71A_HUMAN	HSPA1A	Heat shock 70 kDa protein 1A			0.666667	0.933333	0	0	0	0
P0DMV9	HS71B_HUMAN	HSPA1B	Heat shock 70 kDa protein 1B	0.548431	0.260878	0.666667	0.933333	0.70185	0.6646	1.11105	0.53165	1.05605	0.0786764
P0DOY2	IGLC2_HUMAN	IGLC2	Immunoglobulin lambda constant 2	0.590998	0.228414	1	1	0	0	0	0
P11142	HSP7C_HUMAN	HSPA8	Heat shock cognate 71 kDa protein	0.422277	0.374403	0.583333	0.933333	0.4165	0.6825	1.28357	0.55945	0.610256	-0.712513
P12273	PIP_HUMAN	PIP	Prolactin-inducible protein	0.206591	0.684888	1	0.966667	36.6399	30.0358	19.6468	20.0857	1.21987	0.286732
P13929	ENOB_HUMAN	ENO3	Beta-enolase	0.4993	0.301639	0.520833	0.866667	0	0	0.1214	0.021525
P14618	KPYM_HUMAN	PKM	Pyruvate kinase PKM	0.767893	0.114699	0.770833	0.966667	4.1876	5.2604	7.3218	7.3086	0.796061	-0.329049
P17066	HSP76_HUMAN	HSPA6	Heat shock 70 kDa protein 6	0.282067	0.549647	0.5625	0.933333	0	0	0	0
P17931	LEG3_HUMAN	LGALS3	Galectin-3	0.507774	0.29433	0.5625	0.866667	0.6768	0.64735	1.1074	0.60745	1.04549	0.0641836
P20061	TCO1_HUMAN	TCN1	Transcobalamin-1	0.0645684	1.18998	0.666667	0.8	1.09545	3.4675	2.8258	4.28775	0.315919	-1.66237
P21980	TGM2_HUMAN	TGM2	Protein-glutamine gamma-glutamyltransferase 2 ) ) ) ) )	0.330436	0.480912	0.541667	0.866667	0.76905	1.2103	0.522075	1.21637	0.635421	-0.654215
P26447	S10A4_HUMAN	S100A4	Protein S100-A4	0.517329	0.286233	0.979167	0.9	2.4765	2.8	3.82525	2.99155	0.884464	-0.177124
P27348	1433T_HUMAN	YWHAQ	14-3-3 protein theta	0.774837	0.11079	0.604167	0.833333	0	0	0	0
P30041	PRDX6_HUMAN	PRDX6	Peroxiredoxin-6	0.950672	0.0219695	0.645833	0.9	0.8214	1.0701	0.93625	0.9608	0.767592	-0.381589
P30044	PRDX5_HUMAN	PRDX5	Peroxiredoxin-5, mitochondrial	0.842172	0.0745995	0.729167	0.933333	0.7617	0.7695	0.90625	0.68225	0.989864	-0.0146984
P30740	ILEU_HUMAN	SERPINB1	Leukocyte elastase inhibitor	0.607008	0.216806	0.6875	0.833333	0.9236	0.912	0.8625	0.8523	1.01272	0.0182343
P31025	LCN1_HUMAN	LCN1	Lipocalin-1	0.866255	0.0623542	1	1	56.0492	59.4325	20.429	26.695	0.943072	-0.0845595
P31946	1433B_HUMAN	YWHAB	14-3-3 protein beta/alpha	0.372748	0.428585	0.604167	0.833333	0	0	0	0
P31947	1433S_HUMAN	SFN	14-3-3 protein sigma	0.384967	0.414576	0.604167	0.833333	0	0	0.944	0.6446
P31949	S10AB_HUMAN	S100A11	Protein S100-A11	0.118934	0.924692	0.958333	0.966667	1.993	1.7388	1.67465	0.4929	1.14619	0.19685
P32119	PRDX2_HUMAN	PRDX2	Peroxiredoxin-2	0.776423	0.109902	0.520833	0.833333	0.1148	0.2156	0.4005	0.3311	0.532468	-0.909235
P34931	HS71L_HUMAN	HSPA1L	Heat shock 70 kDa protein 1-like	0.614118	0.211748	0.604167	0.933333	0	0	0	0
P37802	TAGL2_HUMAN	TAGLN2	Transgelin-2	0.32831	0.483716	0.625	0.9	0.78475	0.981	1.25968	0.7722	0.799949	-0.32202
P48741	HSP77_HUMAN	HSPA7	Putative heat shock 70 kDa protein 7			0.5625	0.933333	0	0	0	0
P54652	HSP72_HUMAN	HSPA2	Heat shock-related 70 kDa protein 2	0.344347	0.463004	0.5625	0.933333	0	0	0	0
P55058	PLTP_HUMAN	PLTP	Phospholipid transfer protein	0.0666428	1.17625	0.583333	0.633333	0.8037	0.6245	0.38165	0.4481	1.28695	0.363956
P60174	TPIS_HUMAN	TPI1	Triosephosphate isomerase	0.744664	0.12804	0.5625	0.933333	0.9474	1.07075	1.15245	0.84995	0.8848	-0.176576
P61626	LYSC_HUMAN	LYZ	Lysozyme C	0.179243	0.746558	1	0.733333	70.5438	82.8986	30.9032	53.0898	0.850966	-0.232827
P61981	1433G_HUMAN	YWHAG	14-3-3 protein gamma	0.130801	0.883387	0.604167	0.833333	0	0	0	0
P62258	1433E_HUMAN	YWHAE	14-3-3 protein epsilon	0.467254	0.330447	0.604167	0.833333	0	0.1826	0.7344	0.3559	0	-Inf
P62736	ACTA_HUMAN	ACTA2	Actin, aortic smooth muscle			1	0.966667	0	0	0	0
P62937	PPIA_HUMAN	PPIA	Peptidyl-prolyl cis-trans isomerase A	0.265848	0.575367	0.666667	0.866667	0.8871	1.07995	0.63685	0.572875	0.821427	-0.283796
P63104	1433Z_HUMAN	YWHAZ	14-3-3 protein zeta/delta	0.0840653	1.07538	0.666667	0.933333	0.9946	1.3729	0.897625	0.666275	0.724452	-0.465038
P63261	ACTG_HUMAN	ACTG1	Actin, cytoplasmic 2			1	1	0	0	0	0
P63267	ACTH_HUMAN	ACTG2	Actin, gamma-enteric smooth muscle			1	0.966667	0	0	0	0
P68032	ACTC_HUMAN	ACTC1	Actin, alpha cardiac muscle 1	0.20818	0.681561	1	0.966667	1.05605	2.2589	2.94322	2.7832	0.467506	-1.09694
P68104	EF1A1_HUMAN	EEF1A1	Elongation factor 1-alpha 1	0.495643	0.304831	0.791667	0.9	1.38945	1.3495	1.89742	1.08835	1.0296	0.0420889
P68133	ACTS_HUMAN	ACTA1	Actin, alpha skeletal muscle			1	0.966667	0	0	0	0
P68363	TBA1B_HUMAN	TUBA1B	Tubulin alpha-1B chain	0.0317778	1.49788	0.625	0.9	0	0	0	0
P80188	NGAL_HUMAN	LCN2	Neutrophil gelatinase-associated lipocalin	0.57312	0.241755	0.979167	0.966667	2.2134	2.0686	2.16085	2.5191	1.07	0.0976095
P80748	LV321_HUMAN	IGLV3-21	Immunoglobulin lambda variable 3-21	0.141512	0.849208	0.583333	0.666667	0	0	0	0
Q04917	1433F_HUMAN	YWHAH	14-3-3 protein eta	0.193983	0.712236	0.604167	0.833333	0	0	0	0
Q05639	EF1A2_HUMAN	EEF1A2	Elongation factor 1-alpha 2			0.666667	0.9	0	0	0	0
Q06830	PRDX1_HUMAN	PRDX1	Peroxiredoxin-1	0.884522	0.0532911	0.729167	0.933333	1.1722	1.46575	1.81595	1.33638	0.799727	-0.32242
Q08380	LG3BP_HUMAN	LGALS3BP	Galectin-3-binding protein	0.136627	0.864462	0.6875	0.833333	0.7	1.0988	0.3428	1.0332	0.637059	-0.650502
Q562R1	ACTBL_HUMAN	ACTBL2	Beta-actin-like protein 2	0.920721	0.0358721	0.979167	0.966667	0	0	0	0
Q5VSP4	LC1L1_HUMAN	LCN1P1	Putative lipocalin 1-like protein 1	0.0729624	1.1369	0.979167	0.966667	0	0	0	0
Q5VTE0	EF1A3_HUMAN	EEF1A1P5	Putative elongation factor 1-alpha-like 3	0.416959	0.379906	0.791667	0.9	0	0	0	0
Q6S8J3	POTEE_HUMAN	POTEE	POTE ankyrin domain family member E	0.356937	0.447409	1	0.966667	0	0	0.07775	0.0149
Q71U36	TBA1A_HUMAN	TUBA1A	Tubulin alpha-1A chain			0.583333	0.866667	0	0	0	0
Q9BQE3	TBA1C_HUMAN	TUBA1C	Tubulin alpha-1C chain	0.558828	0.252722	0.645833	0.9	0.7331	0.7465	0.8222	0.4168	0.98205	-0.0261323
Q9BYX7	ACTBM_HUMAN	POTEKP	Putative beta-actin-like protein 3			0.916667	0.966667	0	0	0	0
Q9GZZ8	LACRT_HUMAN	LACRT	Extracellular glycoprotein lacritin	0.440385	0.356167	1	1	26.4058	30.0505	24.7728	15.3967	0.878714	-0.186534

## Sheet: Enrichment Analysis
# background genes	# genes	category	description	FDR value	genes	p-value	term name	transferred FDR value
2054	24	COMPARTMENTS	Extracellular region	2.65e-18	CST4|PRR4|APOA1|TTR|HSPB1|IGJ|ORM1|LPO|HPX|AZGP1|CLU|A2M|ACTB|S100A8|S100A9|DMBT1|MSLN|CST3|PROL1|TF|ORM2|C4A|NUCB2|B2M	9.58e-22	GOCC:0005576	1.75768
975	19	COMPARTMENTS	Extracellular space	1.39e-16	CST4|APOA1|TTR|HSPB1|IGJ|ORM1|LPO|HPX|AZGP1|CLU|A2M|ACTB|S100A8|S100A9|CST3|TF|ORM2|C4A|B2M	1e-19	GOCC:0005615	1.5857
117	10	COMPARTMENTS	Blood microparticle	4.1e-13	APOA1|IGJ|ORM1|HPX|CLU|A2M|ACTB|TF|ORM2|C4A	4.44e-16	GOCC:0072562	1.23872
453	13	COMPARTMENTS	Extracellular organelle	3.59e-12	APOA1|TTR|HSPB1|HPX|CLU|A2M|ACTB|S100A8|S100A9|CST3|TF|C4A|B2M	5.19e-15	GOCC:0043230	1.14449
441	12	COMPARTMENTS	Extracellular vesicle	8.06e-11	APOA1|TTR|HSPB1|HPX|CLU|A2M|ACTB|S100A9|CST3|TF|C4A|B2M	1.46e-13	GOCC:1903561	1.00937
256	10	COMPARTMENTS	Vesicle lumen	3.28e-10	APOA1|TTR|ORM1|HPX|CLU|A2M|S100A9|TF|ORM2|B2M	7.89e-13	GOCC:0031983	0.948413
367	11	COMPARTMENTS	Extracellular exosome	3.28e-10	APOA1|TTR|HSPB1|CLU|A2M|ACTB|S100A9|CST3|TF|C4A|B2M	7.11e-13	GOCC:0070062	0.948413
252	9	COMPARTMENTS	Cytoplasmic vesicle lumen	1.02e-08	APOA1|TTR|ORM1|HPX|CLU|A2M|S100A9|ORM2|B2M	2.95e-11	GOCC:0060205	0.79914
2041	16	COMPARTMENTS	Vesicle	1.21e-07	APOA1|TTR|HSPB1|ORM1|HPX|CLU|A2M|ACTB|S100A8|S100A9|DMBT1|CST3|TF|ORM2|C4A|B2M	3.92e-10	GOCC:0031982	0.691721
692	10	COMPARTMENTS	Secretory granule	2.86e-06	APOA1|TTR|ORM1|CLU|A2M|S100A8|DMBT1|CST3|ORM2|B2M	1.03e-08	GOCC:0030141	0.554363
775	10	COMPARTMENTS	Secretory vesicle	7.52e-06	APOA1|TTR|ORM1|CLU|A2M|S100A8|DMBT1|CST3|ORM2|B2M	2.99e-08	GOCC:0099503	0.512378
1702	13	COMPARTMENTS	Cytoplasmic vesicle	1.37e-05	APOA1|TTR|ORM1|HPX|CLU|A2M|S100A8|S100A9|DMBT1|CST3|TF|ORM2|B2M	5.94e-08	GOCC:0031410	0.486328
1704	13	COMPARTMENTS	Intracellular vesicle	1.37e-05	APOA1|TTR|ORM1|HPX|CLU|A2M|S100A8|S100A9|DMBT1|CST3|TF|ORM2|B2M	6.02e-08	GOCC:0097708	0.486328
229	6	COMPARTMENTS	Secretory granule lumen	0.0001	TTR|ORM1|CLU|A2M|ORM2|B2M	5.26e-07	GOCC:0034774	0.4
68	4	COMPARTMENTS	Platelet alpha granule lumen	0.00044	ORM1|CLU|A2M|ORM2	2.36e-06	GOCC:0031093	0.335655
2926	14	COMPARTMENTS	Membrane-enclosed lumen	0.00079	APOA1|TTR|ORM1|HPX|CLU|A2M|ACTB|S100A9|MSLN|CST3|TF|ORM2|C4A|B2M	4.59e-06	GOCC:0031974	0.310237
2926	14	COMPARTMENTS	Organelle lumen	0.00079	APOA1|TTR|ORM1|HPX|CLU|A2M|ACTB|S100A9|MSLN|CST3|TF|ORM2|C4A|B2M	4.59e-06	GOCC:0043233	0.310237
3055	14	COMPARTMENTS	Endomembrane system	0.0011	APOA1|TTR|ORM1|CLU|A2M|S100A6|S100A8|DMBT1|MSLN|CST3|TF|ORM2|C4A|B2M	7.7e-06	GOCC:0012505	0.295861
91	4	COMPARTMENTS	Platelet alpha granule	0.0011	ORM1|CLU|A2M|ORM2	7.15e-06	GOCC:0031091	0.295861
242	5	COMPARTMENTS	Endocytic vesicle	0.0022	APOA1|HPX|DMBT1|TF|B2M	1.62e-05	GOCC:0030139	0.265758
4	2	COMPARTMENTS	Calprotectin complex	0.0033	S100A8|S100A9	2.53e-05	GOCC:1990660	0.248149
4	2	COMPARTMENTS	S100A9 complex	0.0033	S100A8|S100A9	2.53e-05	GOCC:1990662	0.248149
2924	13	COMPARTMENTS	Intracellular organelle lumen	0.0034	APOA1|TTR|ORM1|HPX|CLU|A2M|ACTB|S100A9|MSLN|CST3|ORM2|C4A|B2M	2.85e-05	GOCC:0070013	0.246852
5	2	COMPARTMENTS	S100A8 complex	0.0041	S100A8|S100A9	3.54e-05	GOCC:1990661	0.238722
148	4	COMPARTMENTS	Endoplasmic reticulum lumen	0.005	APOA1|CLU|C4A|B2M	4.56e-05	GOCC:0005788	0.230103
6	2	COMPARTMENTS	HFE-transferrin receptor complex	0.005	TF|B2M	4.72e-05	GOCC:1990712	0.230103
55	3	COMPARTMENTS	Tertiary granule lumen	0.0063	ORM1|CST3|B2M	6.1e-05	GOCC:1904724	0.220066
62	3	COMPARTMENTS	Specific granule lumen	0.0085	ORM1|ORM2|B2M	8.58e-05	GOCC:0035580	0.207058
12	2	COMPARTMENTS	Spherical high-density lipoprotein particle	0.0146	APOA1|CLU	0.00015	GOCC:0034366	0.183565
20	2	COMPARTMENTS	Endocytic vesicle lumen	0.0355	APOA1|HPX	0.00038	GOCC:0071682	0.144977
14603	26	COMPARTMENTS	Cellular_component	0.0447	CST4|PRR4|APOA1|TTR|HSPB1|IGJ|ORM1|LPO|HPX|AZGP1|CLU|A2M|ACTB|S100A6|S100A8|S100A9|DMBT1|ZG16B|MSLN|CST3|PROL1|TF|ORM2|C4A|NUCB2|B2M	0.0005	GOCC:0005575	0.134969
70	8	DISEASES	Amyloidosis	2.78e-10	APOA1|TTR|AZGP1|CLU|A2M|ACTB|CST3|B2M	6.43e-14	DOID:9120	0.955596
21	5	DISEASES	Familial visceral amyloidosis	3.82e-07	APOA1|TTR|AZGP1|ACTB|B2M	1.77e-10	DOID:0050636	0.641794
688	7	DISEASES	Immune system disease	0.0361	TTR|IGJ|CLU|ACTB|S100A8|C4A|B2M	2.5e-05	DOID:2914	0.144249
45	3	DISEASES	Alzheimers disease	0.0373	CLU|A2M|CST3	3.45e-05	DOID:10652	0.142829
74	10	GO Biological Process	retina homeostasis	1.06e-13	CST4|PRR4|HSPB1|IGJ|AZGP1|ACTB|ZG16B|PROL1|TF|B2M	6.06e-18	GO:0001895	1.29747
1676	15	GO Biological Process	homeostatic process	1.12e-06	CST4|PRR4|APOA1|HSPB1|IGJ|LPO|HPX|AZGP1|ACTB|S100A8|S100A9|ZG16B|PROL1|TF|B2M	3.2e-10	GO:0042592	0.595078
697	11	GO Biological Process	regulated exocytosis	1.75e-06	APOA1|TTR|ORM1|CLU|A2M|S100A8|S100A9|CST3|TF|ORM2|B2M	5.98e-10	GO:0045055	0.575696
1805	15	GO Biological Process	vesicle-mediated transport	2.25e-06	APOA1|TTR|IGJ|ORM1|HPX|CLU|A2M|ACTB|S100A8|S100A9|DMBT1|CST3|TF|ORM2|B2M	8.99e-10	GO:0016192	0.564782
4042	19	GO Biological Process	regulation of biological quality	2.78e-05	CST4|PRR4|APOA1|TTR|HSPB1|IGJ|LPO|HPX|AZGP1|CLU|A2M|ACTB|S100A8|S100A9|ZG16B|PROL1|TF|NUCB2|B2M	1.43e-08	GO:0065008	0.455596
969	11	GO Biological Process	immune effector process	3.14e-05	TTR|ORM1|CLU|ACTB|S100A8|S100A9|DMBT1|CST3|ORM2|C4A|B2M	1.79e-08	GO:0002252	0.450307
129	6	GO Biological Process	platelet degranulation	3.14e-05	APOA1|ORM1|CLU|A2M|TF|ORM2	1.97e-08	GO:0002576	0.450307
275	7	GO Biological Process	humoral immune response	7.73e-05	IGJ|CLU|S100A8|S100A9|DMBT1|C4A|B2M	6.18e-08	GO:0006959	0.411182
160	6	GO Biological Process	antimicrobial humoral response	7.73e-05	IGJ|CLU|S100A8|S100A9|DMBT1|B2M	6.76e-08	GO:0019730	0.411182
641	9	GO Biological Process	leukocyte mediated immunity	8.94e-05	TTR|ORM1|CLU|S100A8|S100A9|CST3|ORM2|C4A|B2M	8.68e-08	GO:0002443	0.404866
1296	11	GO Biological Process	defense response	0.00033	IGJ|ORM1|LPO|CLU|S100A8|S100A9|DMBT1|CST3|ORM2|C4A|B2M	3.39e-07	GO:0006952	0.348149
4353	18	GO Biological Process	transport	0.0004	APOA1|TTR|HSPB1|IGJ|ORM1|HPX|AZGP1|CLU|A2M|ACTB|S100A6|S100A8|S100A9|DMBT1|CST3|TF|ORM2|B2M	4.32e-07	GO:0006810	0.339794
1075	10	GO Biological Process	cell activation	0.00054	TTR|HSPB1|ORM1|CLU|ACTB|S100A8|S100A9|CST3|ORM2|B2M	6.12e-07	GO:0001775	0.326761
585	8	GO Biological Process	myeloid leukocyte activation	0.00054	TTR|ORM1|CLU|S100A8|S100A9|CST3|ORM2|B2M	6.48e-07	GO:0002274	0.326761
2481	14	GO Biological Process	immune system process	0.00054	TTR|IGJ|ORM1|AZGP1|CLU|ACTB|S100A8|S100A9|DMBT1|CST3|TF|ORM2|C4A|B2M	6.13e-07	GO:0002376	0.326761
3485	16	GO Biological Process	response to stress	0.00064	APOA1|HSPB1|IGJ|ORM1|LPO|CLU|A2M|ACTB|S100A8|S100A9|DMBT1|CST3|TF|ORM2|C4A|B2M	8.98e-07	GO:0006950	0.319382
131	5	GO Biological Process	transition metal ion homeostasis	0.00064	HPX|S100A8|S100A9|TF|B2M	8.76e-07	GO:0055076	0.319382
418	7	GO Biological Process	regulation of endopeptidase activity	0.00067	CST4|A2M|S100A8|S100A9|CST3|PROL1|C4A	9.91e-07	GO:0052548	0.317393
277	6	GO Biological Process	defense response to bacterium	0.001	IGJ|LPO|S100A8|S100A9|DMBT1|B2M	1.56e-06	GO:0042742	0.3
2310	13	GO Biological Process	response to external stimulus	0.0012	APOA1|HSPB1|IGJ|LPO|CLU|S100A8|S100A9|DMBT1|CST3|TF|C4A|NUCB2|B2M	2.06e-06	GO:0009605	0.292082
75	4	GO Biological Process	regulation of humoral immune response	0.0015	HPX|CLU|A2M|C4A	3.42e-06	GO:0002920	0.282391
1588	11	GO Biological Process	immune response	0.0015	TTR|IGJ|ORM1|CLU|S100A8|S100A9|DMBT1|CST3|ORM2|C4A|B2M	2.53e-06	GO:0006955	0.282391
484	7	GO Biological Process	neutrophil degranulation	0.0015	TTR|ORM1|S100A8|S100A9|CST3|ORM2|B2M	2.59e-06	GO:0043312	0.282391
2375	13	GO Biological Process	establishment of localization in cell	0.0015	APOA1|TTR|HSPB1|ORM1|CLU|A2M|ACTB|S100A8|S100A9|CST3|TF|ORM2|B2M	2.82e-06	GO:0051649	0.282391
1256	10	GO Biological Process	response to other organism	0.0015	HSPB1|IGJ|LPO|CLU|S100A8|S100A9|DMBT1|TF|C4A|B2M	2.5e-06	GO:0051707	0.282391
747	8	GO Biological Process	regulation of proteolysis	0.0016	CST4|CLU|A2M|S100A8|S100A9|CST3|PROL1|C4A	3.95e-06	GO:0030162	0.279588
85	4	GO Biological Process	regulation of interleukin-1 beta production	0.0021	APOA1|HSPB1|ORM1|ORM2	5.51e-06	GO:0032651	0.267778
88	4	GO Biological Process	positive regulation of tumor necrosis factor production	0.0024	HSPB1|ORM1|CLU|ORM2	6.29e-06	GO:0032760	0.261979
2	2	GO Biological Process	neutrophil aggregation	0.0036	S100A8|S100A9	1.01e-05	GO:0070488	0.24437
2693	13	GO Biological Process	regulation of cellular protein metabolic process	0.004	CST4|APOA1|HSPB1|HPX|CLU|A2M|ACTB|S100A8|S100A9|CST3|PROL1|TF|C4A	1.15e-05	GO:0032268	0.239794
1163	9	GO Biological Process	negative regulation of molecular function	0.004	CST4|APOA1|HSPB1|A2M|ACTB|CST3|PROL1|C4A|B2M	1.18e-05	GO:0044092	0.239794
634	7	GO Biological Process	response to bacterium	0.0046	IGJ|LPO|S100A8|S100A9|DMBT1|TF|B2M	1.48e-05	GO:0009617	0.233724
1899	11	GO Biological Process	interspecies interaction between organisms	0.0046	HSPB1|IGJ|LPO|HPX|CLU|S100A8|S100A9|DMBT1|TF|C4A|B2M	1.42e-05	GO:0044419	0.233724
108	4	GO Biological Process	cellular transition metal ion homeostasis	0.0046	HPX|S100A8|S100A9|TF	1.37e-05	GO:0046916	0.233724
900	8	GO Biological Process	defense response to other organism	0.0047	IGJ|LPO|CLU|S100A8|S100A9|DMBT1|C4A|B2M	1.53e-05	GO:0098542	0.23279
418	6	GO Biological Process	regulation of immune effector process	0.0048	APOA1|HPX|CLU|A2M|C4A|B2M	1.58e-05	GO:0002697	0.231876
6933	20	GO Biological Process	multicellular organismal process	0.0056	CST4|PRR4|APOA1|HSPB1|IGJ|LPO|AZGP1|CLU|A2M|ACTB|S100A6|S100A8|S100A9|DMBT1|ZG16B|MSLN|CST3|PROL1|TF|B2M	1.94e-05	GO:0032501	0.225181
2386	12	GO Biological Process	regulation of catalytic activity	0.0056	CST4|APOA1|HSPB1|CLU|A2M|ACTB|S100A8|S100A9|CST3|PROL1|TF|C4A	2.02e-05	GO:0050790	0.225181
39	3	GO Biological Process	detection of chemical stimulus involved in sensory perception of bitter taste	0.0061	CST4|LPO|AZGP1	2.3e-05	GO:0001580	0.221467
450	6	GO Biological Process	negative regulation of hydrolase activity	0.0062	CST4|APOA1|A2M|CST3|PROL1|C4A	2.38e-05	GO:0051346	0.220761
4	2	GO Biological Process	sequestering of zinc ion	0.0065	S100A8|S100A9	2.53e-05	GO:0032119	0.218709
703	7	GO Biological Process	innate immune response	0.0073	IGJ|CLU|S100A8|S100A9|DMBT1|C4A|B2M	2.87e-05	GO:0045087	0.213668
8046	21	GO Biological Process	response to stimulus	0.0105	CST4|APOA1|TTR|HSPB1|IGJ|ORM1|LPO|AZGP1|CLU|A2M|ACTB|S100A6|S100A8|S100A9|DMBT1|CST3|TF|ORM2|C4A|NUCB2|B2M	4.37e-05	GO:0050896	0.197881
6	2	GO Biological Process	peptidyl-cysteine S-nitrosylation	0.0112	S100A8|S100A9	4.72e-05	GO:0018119	0.195078
515	6	GO Biological Process	inflammatory response	0.0116	ORM1|CLU|S100A8|S100A9|ORM2|C4A	5.03e-05	GO:0006954	0.193554
53	3	GO Biological Process	positive regulation of receptor-mediated endocytosis	0.0122	CLU|TF|B2M	5.49e-05	GO:0048260	0.191364
532	6	GO Biological Process	response to wounding	0.0132	APOA1|HSPB1|A2M|ACTB|S100A8|CST3	6.01e-05	GO:0009611	0.187943
55	3	GO Biological Process	positive regulation of interleukin-1 beta production	0.0132	HSPB1|ORM1|ORM2	6.1e-05	GO:0032731	0.187943
7	2	GO Biological Process	regulation of iron ion transport	0.0132	TF|B2M	6.06e-05	GO:0034756	0.187943
1437	9	GO Biological Process	regulation of response to stress	0.0132	APOA1|HSPB1|HPX|CLU|A2M|S100A8|S100A9|TF|B2M	6.25e-05	GO:0080134	0.187943
56	3	GO Biological Process	regulation of complement activation	0.0134	CLU|A2M|C4A	6.42e-05	GO:0030449	0.18729
164	4	GO Biological Process	regulation of intrinsic apoptotic signaling pathway	0.0139	HSPB1|CLU|S100A8|S100A9	6.73e-05	GO:2001242	0.185699
59	3	GO Biological Process	antibacterial humoral response	0.015	IGJ|DMBT1|B2M	7.45e-05	GO:0019731	0.182391
60	3	GO Biological Process	positive regulation of intrinsic apoptotic signaling pathway	0.0155	CLU|S100A8|S100A9	7.81e-05	GO:2001244	0.180967
1514	9	GO Biological Process	regulation of immune system process	0.0182	APOA1|ORM1|HPX|CLU|A2M|ACTB|ORM2|C4A|B2M	9.37e-05	GO:0002682	0.173993
184	4	GO Biological Process	receptor-mediated endocytosis	0.0198	APOA1|IGJ|HPX|DMBT1	0.0001	GO:0006898	0.170333
360	5	GO Biological Process	post-translational protein modification	0.0198	APOA1|MSLN|CST3|TF|C4A	0.0001	GO:0043687	0.170333
10	2	GO Biological Process	antigen processing and presentation of peptide antigen via MHC class Ib	0.0204	AZGP1|B2M	0.00011	GO:0002428	0.169037
10	2	GO Biological Process	chemokine production	0.0204	S100A8|S100A9	0.00011	GO:0032602	0.169037
71	3	GO Biological Process	iron ion transport	0.0228	HPX|TF|B2M	0.00013	GO:0006826	0.164207
896	7	GO Biological Process	regulation of immune response	0.0234	APOA1|HPX|CLU|A2M|ACTB|C4A|B2M	0.00013	GO:0050776	0.163078
11	2	GO Biological Process	cellular response to iron ion	0.0234	TF|B2M	0.00013	GO:0071281	0.163078
74	3	GO Biological Process	acute inflammatory response	0.0246	ORM1|S100A8|ORM2	0.00014	GO:0002526	0.160906
923	7	GO Biological Process	positive regulation of transport	0.0268	APOA1|CLU|ACTB|S100A8|TF|C4A|B2M	0.00016	GO:0051050	0.157187
1284	8	GO Biological Process	regulation of hydrolase activity	0.0315	CST4|APOA1|A2M|S100A8|S100A9|CST3|PROL1|C4A	0.00019	GO:0051336	0.150169
83	3	GO Biological Process	iron ion homeostasis	0.0329	HPX|TF|B2M	0.0002	GO:0055072	0.14828
433	5	GO Biological Process	endocytosis	0.0402	APOA1|IGJ|HPX|ACTB|DMBT1	0.00024	GO:0006897	0.139577
1013	7	GO Biological Process	regulation of response to external stimulus	0.0457	APOA1|HSPB1|HPX|A2M|S100A8|S100A9|NUCB2	0.00028	GO:0032101	0.134008
17	2	GO Biological Process	reverse cholesterol transport	0.0463	APOA1|CLU	0.00029	GO:0043691	0.133442
3195	26	GO Cellular Component	extracellular space	9.28e-18	CST4|PRR4|APOA1|TTR|HSPB1|IGJ|ORM1|LPO|HPX|AZGP1|CLU|A2M|ACTB|S100A6|S100A8|S100A9|DMBT1|ZG16B|MSLN|CST3|PROL1|TF|ORM2|C4A|NUCB2|B2M	3.78e-21	GO:0005615	1.70325
2099	23	GO Cellular Component	extracellular exosome	1.3e-16	CST4|APOA1|TTR|HSPB1|IGJ|ORM1|LPO|HPX|AZGP1|CLU|A2M|ACTB|S100A6|S100A8|S100A9|DMBT1|ZG16B|CST3|TF|ORM2|C4A|NUCB2|B2M	1.06e-19	GO:0070062	1.58861
115	10	GO Cellular Component	blood microparticle	1.55e-13	APOA1|IGJ|ORM1|HPX|CLU|A2M|ACTB|TF|ORM2|C4A	3.77e-16	GO:0072562	1.28097
527	12	GO Cellular Component	extracellular matrix	3.48e-10	APOA1|ORM1|HPX|AZGP1|CLU|A2M|S100A6|S100A8|S100A9|DMBT1|CST3|ORM2	1.13e-12	GO:0031012	0.945842
396	11	GO Cellular Component	collagen-containing extracellular matrix	4.34e-10	APOA1|ORM1|HPX|AZGP1|CLU|A2M|S100A6|S100A8|S100A9|CST3|ORM2	1.59e-12	GO:0062023	0.936251
324	10	GO Cellular Component	secretory granule lumen	1.86e-09	APOA1|TTR|ORM1|CLU|A2M|S100A8|S100A9|TF|ORM2|B2M	7.56e-12	GO:0034774	0.873049
845	12	GO Cellular Component	secretory granule	4.71e-08	APOA1|TTR|ORM1|CLU|A2M|S100A8|S100A9|DMBT1|CST3|TF|ORM2|B2M	2.49e-10	GO:0030141	0.732698
308	7	GO Cellular Component	endoplasmic reticulum lumen	2.15e-05	APOA1|CLU|MSLN|CST3|TF|C4A|B2M	1.31e-07	GO:0005788	0.466756
68	4	GO Cellular Component	platelet alpha granule lumen	0.00036	ORM1|CLU|A2M|ORM2	2.36e-06	GO:0031093	0.34437
2386	13	GO Cellular Component	cytoplasmic vesicle	0.00043	APOA1|TTR|ORM1|HPX|CLU|A2M|S100A8|S100A9|DMBT1|CST3|TF|ORM2|B2M	2.97e-06	GO:0031410	0.336653
4542	16	GO Cellular Component	endomembrane system	0.0041	APOA1|TTR|ORM1|CLU|A2M|S100A6|S100A8|S100A9|DMBT1|MSLN|CST3|TF|ORM2|C4A|NUCB2|B2M	3.3e-05	GO:0012505	0.238722
301	5	GO Cellular Component	endocytic vesicle	0.0053	APOA1|HPX|DMBT1|TF|B2M	4.52e-05	GO:0030139	0.227572
55	3	GO Cellular Component	tertiary granule lumen	0.0068	ORM1|CST3|B2M	6.1e-05	GO:1904724	0.216749
824	7	GO Cellular Component	cell surface	0.0081	APOA1|AZGP1|CLU|DMBT1|MSLN|TF|B2M	7.8e-05	GO:0009986	0.209151
8	2	GO Cellular Component	HFE-transferrin receptor complex	0.0081	TF|B2M	7.57e-05	GO:1990712	0.209151
62	3	GO Cellular Component	specific granule lumen	0.0084	ORM1|ORM2|B2M	8.58e-05	GO:0035580	0.207572
9	2	GO Cellular Component	spherical high-density lipoprotein particle	0.0087	APOA1|CLU	9.25e-05	GO:0034366	0.206048
20	2	GO Cellular Component	endocytic vesicle lumen	0.035	APOA1|HPX	0.00038	GO:0071682	0.145593
1438	8	GO Cellular Component	endoplasmic reticulum	0.0355	APOA1|CLU|MSLN|CST3|TF|C4A|NUCB2|B2M	0.0004	GO:0005783	0.144977
377	7	GO Molecular Function	enzyme inhibitor activity	0.0026	CST4|APOA1|HSPB1|A2M|CST3|PROL1|C4A	5.02e-07	GO:0004857	0.258503
181	5	GO Molecular Function	endopeptidase inhibitor activity	0.0107	CST4|A2M|CST3|PROL1|C4A	4.09e-06	GO:0004866	0.197062
4	2	GO Molecular Function	Toll-like receptor 4 binding	0.022	S100A8|S100A9	2.53e-05	GO:0035662	0.165758
6	2	GO Molecular Function	arachidonic acid binding	0.0352	S100A8|S100A9	4.72e-05	GO:0050544	0.145346
63	3	GO Molecular Function	calcium-dependent protein binding	0.0469	A2M|S100A6|DMBT1	8.98e-05	GO:0048306	0.132883
89	4	KEGG Pathways	Salivary secretion	0.003	CST4|LPO|DMBT1|CST3	6.57e-06	hsa04970	0.252288
82	3	KEGG Pathways	Complement and coagulation cascades	0.0433	CLU|A2M|C4A	0.00019	hsa04610	0.136351
127	6	Reactome Pathways	Platelet degranulation	0.00031	APOA1|ORM1|CLU|A2M|TF|ORM2	1.8e-08	HSA-114608	0.350864
1025	11	Reactome Pathways	Innate Immune System	0.00031	TTR|ORM1|LPO|CLU|ACTB|S100A8|S100A9|CST3|ORM2|C4A|B2M	3.18e-08	HSA-168249	0.350864
107	5	Reactome Pathways	Post-translational protein phosphorylation	0.0014	APOA1|MSLN|CST3|TF|C4A	3.34e-07	HSA-8957275	0.285387
124	5	Reactome Pathways	Regulation of Insulin-like Growth Factor (IGF) transport and uptake by Insulin-like Growth Factor Binding Proteins (IGFBPs)	0.0023	APOA1|MSLN|CST3|TF|C4A	6.74e-07	HSA-381426	0.263827
605	8	Reactome Pathways	Hemostasis	0.0024	APOA1|IGJ|ORM1|CLU|A2M|ACTB|TF|ORM2	8.33e-07	HSA-109582	0.261979
13	3	Reactome Pathways	Scavenging of heme from plasma	0.0027	APOA1|IGJ|HPX	1.15e-06	HSA-2168880	0.256864
473	7	Reactome Pathways	Neutrophil degranulation	0.0043	TTR|ORM1|S100A8|S100A9|CST3|ORM2|B2M	2.23e-06	HSA-6798695	0.236653
78	4	Reactome Pathways	Amyloid fiber formation	0.0069	APOA1|TTR|CST3|B2M	3.97e-06	HSA-977225	0.216115
60	11	TISSUES	Saliva	1.16e-17	CST4|IGJ|ORM1|LPO|HPX|AZGP1|CLU|DMBT1|CST3|PROL1|TF	4.65e-21	BTO:0001202	1.69355
45	8	TISSUES	Cerebrospinal fluid	3.11e-12	TTR|ORM1|HPX|CLU|CST3|TF|ORM2|C4A	2.48e-15	BTO:0000237	1.15072
24	7	TISSUES	Tear	6.44e-12	CST4|PRR4|IGJ|DMBT1|MSLN|PROL1|B2M	7.72e-15	BTO:0001499	1.11911
1874	18	TISSUES	Liver	2.27e-10	APOA1|TTR|HSPB1|IGJ|ORM1|HPX|AZGP1|CLU|A2M|ACTB|S100A6|S100A8|S100A9|TF|ORM2|C4A|NUCB2|B2M	3.62e-13	BTO:0000759	0.964397
19	6	TISSUES	Bile	2.56e-10	IGJ|ORM1|HPX|AZGP1|TF|ORM2	5.11e-13	BTO:0000121	0.959176
216	9	TISSUES	Spinal cord	2.79e-09	TTR|ORM1|HPX|CLU|ACTB|CST3|TF|ORM2|C4A	7.81e-12	BTO:0001279	0.85544
170	8	TISSUES	Bone marrow cell	1.69e-08	TTR|IGJ|HPX|CLU|A2M|TF|C4A|B2M	5.39e-11	BTO:0004850	0.777211
477	10	TISSUES	Bone marrow	8.49e-08	TTR|IGJ|ORM1|HPX|CLU|A2M|TF|ORM2|C4A|B2M	3.05e-10	BTO:0000141	0.707109
134	7	TISSUES	Plasma cell	1.26e-07	TTR|IGJ|HPX|CLU|A2M|C4A|B2M	5.05e-10	BTO:0000392	0.689963
18	4	TISSUES	Vermiform appendix	3.99e-06	IGJ|ACTB|CST3|B2M	1.75e-08	BTO:0000084	0.539903
338	7	TISSUES	Blood platelet	4.69e-05	PRR4|APOA1|TTR|HSPB1|CLU|ACTB|S100A6	2.44e-07	BTO:0000132	0.432883
108	5	TISSUES	Salivary gland	6.23e-05	CST4|PRR4|LPO|ZG16B|B2M	3.49e-07	BTO:0001203	0.420551
1678	12	TISSUES	Blood	8.36e-05	PRR4|APOA1|TTR|HSPB1|AZGP1|CLU|ACTB|S100A6|S100A8|S100A9|CST3|B2M	5.01e-07	BTO:0000089	0.407779
786	8	TISSUES	Eye	0.0008	PRR4|TTR|HSPB1|CLU|ACTB|PROL1|TF|B2M	5.73e-06	BTO:0000439	0.309691
27	3	TISSUES	Parietal lobe	0.0011	CLU|ACTB|CST3	8.23e-06	BTO:0001001	0.295861
31	3	TISSUES	Occipital lobe	0.0015	CLU|ACTB|CST3	1.21e-05	BTO:0000293	0.282391
1258	9	TISSUES	Intestine	0.0026	HSPB1|IGJ|AZGP1|CLU|A2M|ACTB|DMBT1|CST3|B2M	2.2e-05	BTO:0000648	0.258503
6	2	TISSUES	Tear gland	0.0054	PRR4|PROL1	4.72e-05	BTO:0000044	0.226761
54	3	TISSUES	Right atrium	0.0063	APOA1|HSPB1|TF	5.79e-05	BTO:0001703	0.220066
58	3	TISSUES	Ascites	0.0074	ACTB|S100A8|B2M	7.1e-05	BTO:0000091	0.213077
565	6	TISSUES	Pancreas	0.0082	TTR|HSPB1|CLU|ACTB|MSLN|B2M	8.36e-05	BTO:0000988	0.208619
61	3	TISSUES	Left atrium	0.0082	APOA1|HSPB1|TF	8.19e-05	BTO:0001702	0.208619
9	2	TISSUES	Submandibular gland	0.0086	CST4|LPO	9.25e-05	BTO:0001316	0.20655
195	4	TISSUES	Interstitial cell of Cajal	0.0116	APOA1|TTR|ACTB|TF	0.00013	BTO:0003914	0.193554
74	3	TISSUES	Left ventricle	0.0123	APOA1|HSPB1|TF	0.00014	BTO:0001629	0.191009
290	4	TISSUES	Stomach	0.0434	CLU|ACTB|S100A8|B2M	0.00057	BTO:0001307	0.136251
1158	7	TISSUES	Lung	0.046	HSPB1|A2M|ACTB|S100A9|DMBT1|MSLN|B2M	0.00062	BTO:0000763	0.133724
1818	23	UniProt Keywords	Secreted	3.83e-18	CST4|PRR4|APOA1|TTR|IGJ|ORM1|LPO|HPX|AZGP1|CLU|A2M|S100A8|S100A9|DMBT1|ZG16B|MSLN|CST3|PROL1|TF|ORM2|C4A|NUCB2|B2M	4.15e-21	KW-0964	1.74168
3233	21	UniProt Keywords	Signal	5.18e-10	CST4|PRR4|APOA1|TTR|IGJ|ORM1|LPO|HPX|AZGP1|CLU|A2M|DMBT1|ZG16B|MSLN|CST3|PROL1|TF|ORM2|C4A|NUCB2|B2M	1.12e-12	KW-0732	0.928567
66	6	UniProt Keywords	Pyrrolidone carboxylic acid	1.33e-07	IGJ|ORM1|AZGP1|PROL1|ORM2|B2M	4.33e-10	KW-0873	0.687615
24	4	UniProt Keywords	Amyloid	1.13e-05	APOA1|TTR|CST3|B2M	4.88e-08	KW-0034	0.494692
31	4	UniProt Keywords	Amyloidosis	2.29e-05	APOA1|TTR|CST3|B2M	1.24e-07	KW-1008	0.464016
4349	18	UniProt Keywords	Glycoprotein	6.55e-05	APOA1|TTR|IGJ|ORM1|LPO|HPX|AZGP1|CLU|A2M|DMBT1|ZG16B|MSLN|CST3|PROL1|TF|ORM2|C4A|B2M	4.26e-07	KW-0325	0.418376
3304	15	UniProt Keywords	Disulfide bond	0.00041	CST4|IGJ|ORM1|LPO|HPX|AZGP1|CLU|A2M|DMBT1|MSLN|CST3|TF|ORM2|C4A|B2M	3.1e-06	KW-1015	0.338722
116	4	UniProt Keywords	Protease inhibitor	0.0021	CST4|A2M|CST3|PROL1	1.8e-05	KW-0646	0.267778
8	2	UniProt Keywords	Thioester bond	0.0078	A2M|C4A	7.57e-05	KW-0882	0.210791
12	2	UniProt Keywords	Glycation	0.0141	APOA1|B2M	0.00015	KW-0971	0.185078
93	3	UniProt Keywords	Antimicrobial	0.0229	LPO|S100A8|S100A9	0.00027	KW-0929	0.164016
19	2	UniProt Keywords	Acute phase	0.027	ORM1|ORM2	0.00035	KW-0011	0.156864
108	3	UniProt Keywords	Neuropathy	0.0297	APOA1|TTR|HSPB1	0.00042	KW-0622	0.152724
522	5	UniProt Keywords	Immunity	0.0356	CLU|S100A8|S100A9|C4A|B2M	0.00057	KW-0391	0.144855
24	2	UniProt Keywords	Thiol protease inhibitor	0.0356	CST4|CST3	0.00054	KW-0789	0.144855
29	2	UniProt Keywords	Complement pathway	0.0444	CLU|C4A	0.00077	KW-0180	0.135262
324	4	UniProt Keywords	Innate immunity	0.0468	CLU|S100A8|S100A9|C4A	0.00086	KW-0399	0.132975
32	2	UniProt Keywords	Oxidation	0.0475	APOA1|ACTB	0.00093	KW-0558	0.132331
182	5	WikiPathways	Vitamin D receptor pathway	0.0073	ORM1|S100A6|S100A8|S100A9|ORM2	4.2e-06	WP2877	0.213668
